# Supplementary material
Source: Springer Nature journal article supplement (https://www.springermedizin.de/resource/supplementary/12955_2012_1134_MOESM3_ESM.pdf/9559358)
Supplement: MOESM3 [file 9559358]

Descriptive Statistics of scale scores

Scores at Baseline:

| Variable        | N   | Mean  | Std Dev | Minimum | Maximum |
|-----------------|-----|-------|---------|---------|---------|
| APS20           | 209 | 1.46  | 0.71    | 0.15    | 3.60    |
| AP-F1           | 209 | 1.32  | 0.76    | 0.00    | 3.67    |
| AP-F2           | 209 | 1.63  | 0.78    | 0.11    | 3.89    |
| THI-12 total    | 211 | 11.18 | 5.26    | 1.00    | 24.00   |
| TRS total month | 58  | 16.41 | 6.16    | 4.00    | 30.00   |
| TRS total week  | 153 | 14.82 | 7.14    | 0.00    | 30.00   |

Change from Baseline to Follow-up (score from Baseline minus score from Follow-up):

| Variable        | N   | Mean  | Std Dev | Minimum | Maximum |
|-----------------|-----|-------|---------|---------|---------|
| APS20           | 166 | -0.02 | 0.31    | -0.95   | 0.65    |
| AP-F1           | 166 | -0.01 | 0.32    | -1.00   | 0.89    |
| AP-F2           | 166 | -0.01 | 0.39    | -1.22   | 1.11    |
| THI-12 total    | 175 | 0.62  | 2.62    | -6.00   | 15.00   |
| TRS total month | 45  | 0.71  | 2.57    | -7.00   | 6.00    |
| TRS total week  | 129 | -0.29 | 4.13    | -14.00  | 15.00   |
